# Supplementary material
Source: Springer Nature journal article supplement (https://www.springermedizin.de/resource/supplementary/12885_2013_3974_MOESM10_ESM.pdf/9464936)

**A**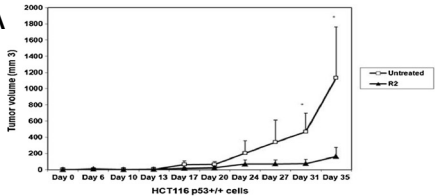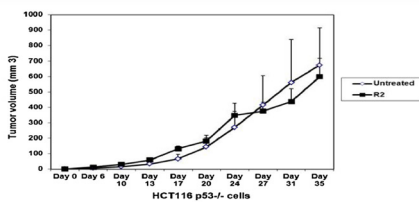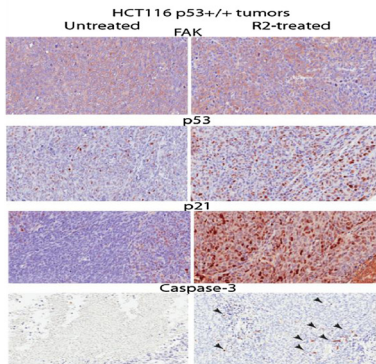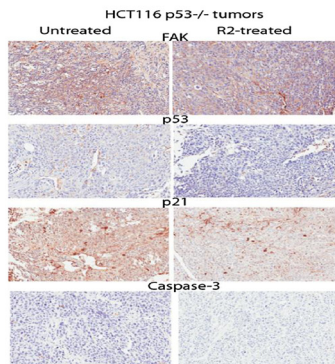

**HCT116p53+/+ tumor xenografts**

**B**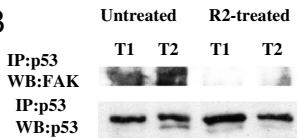

Supplement: MOESM10 [file 9464936]
